# Supplementary material
Source: PubMed Central journal article supplement (PMC5983537)

Fig 2b Full Length Western Blot (HDAC1)

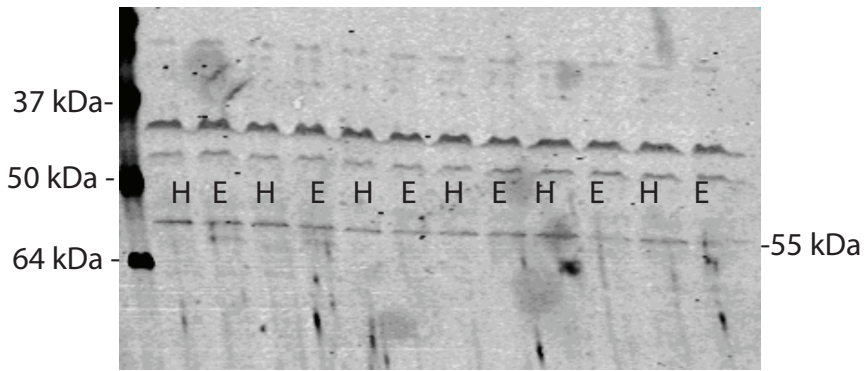

Fig 2b Full Length Western Blot (HDAC2)

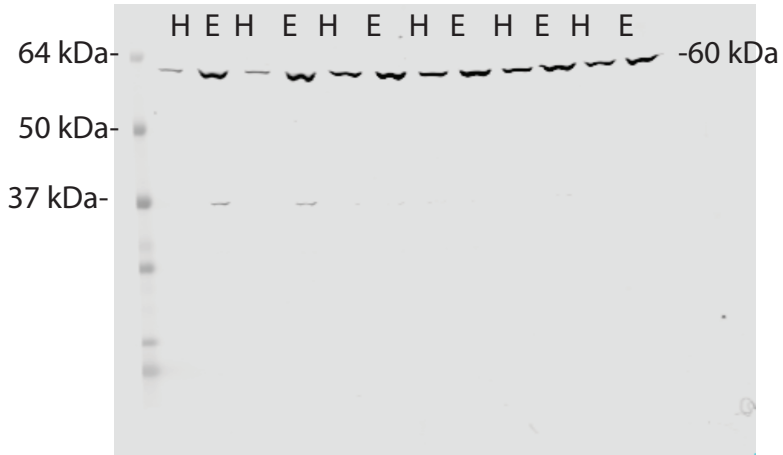

Fig 2b Full Length Western Blot (HDAC3)

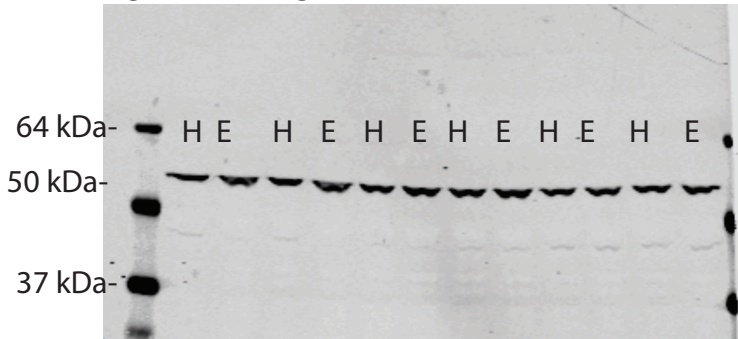

Fig 2b-D Full Length Western Blot ( $\beta$ -actin)

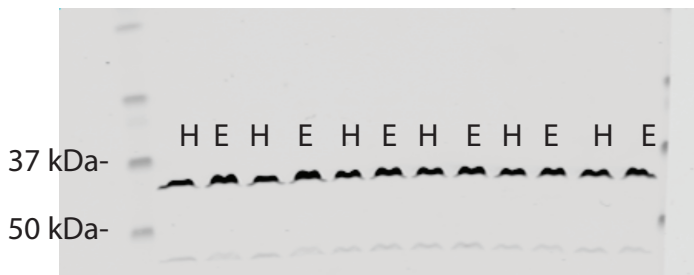

Supplement: 41386_2018_34_MOESM1_ESM.pdf [file 41386_2018_34_MOESM1_ESM.pdf]
