# Supplementary material
Source: PubMed Central journal article supplement (PMC5983537)

Fig 1C. Full Length Blots ( $\alpha 1$ )

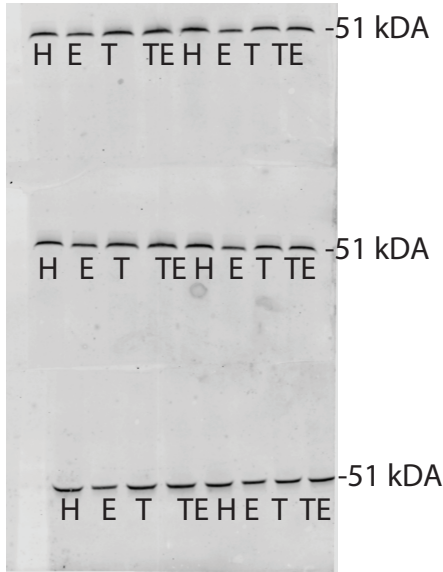

Fig 1C. Full Length Blots ( $\delta$ )

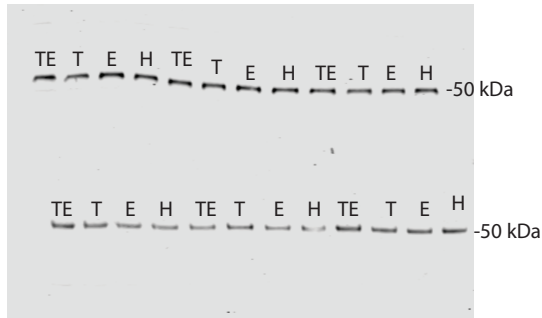

Fig 1C. Full Length Blots ( $\beta 2$ )

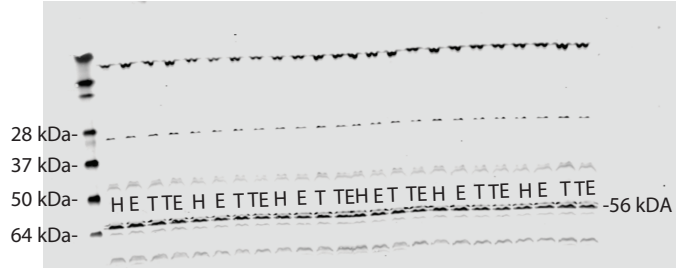

Fig 1C. Full Length Blots ( $\alpha 4$ )

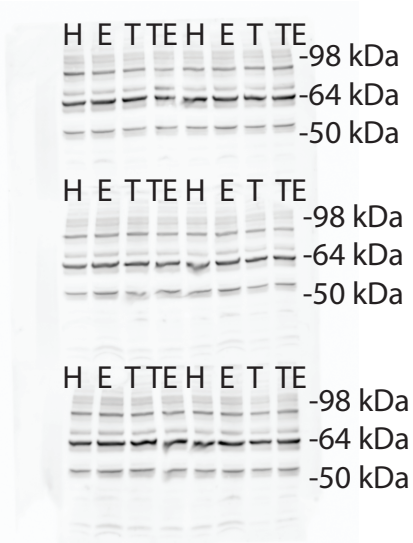

Fig 1C. Full Length Blots ( $\beta 3$ )

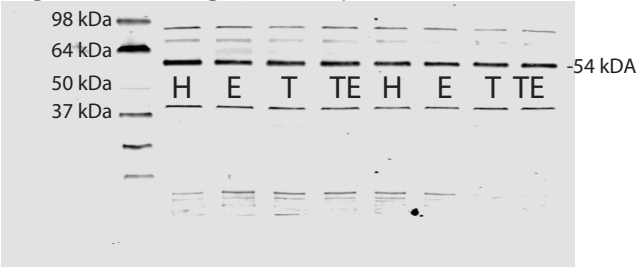

Fig 1C. Full Length Blots ( $\beta$ -actin)

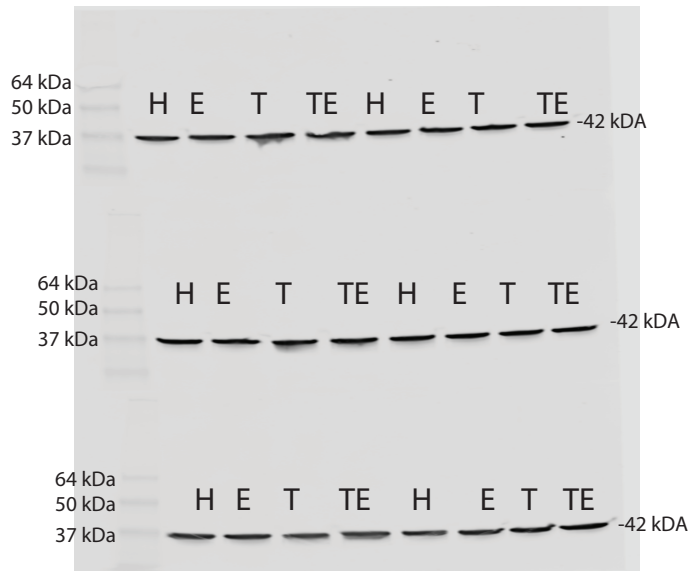

Fig 1C. Full Length Blots ( $\gamma 2$ )

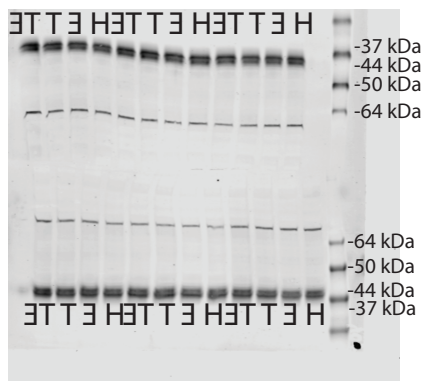

Supplement: 41386_2018_34_MOESM6_ESM.pdf [file 41386_2018_34_MOESM6_ESM.pdf]
