# Supplementary material
Source: PubMed Central journal article supplement (PMC5983537)

Fig 1e Full Length Blots (pH3Ac)

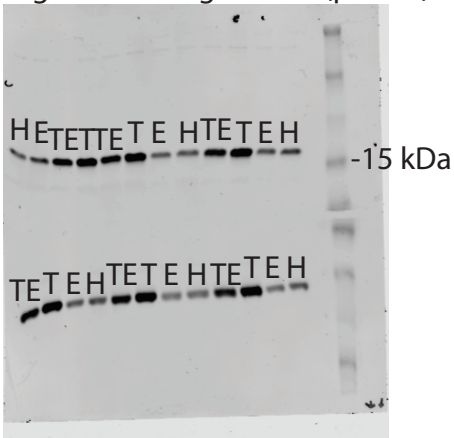

Fig 1e Full Length Blots (H3K9me3)

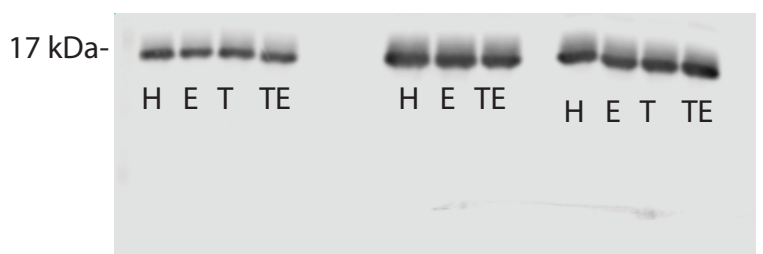

Fig 1e Full Length Blots (H3K9Ac)

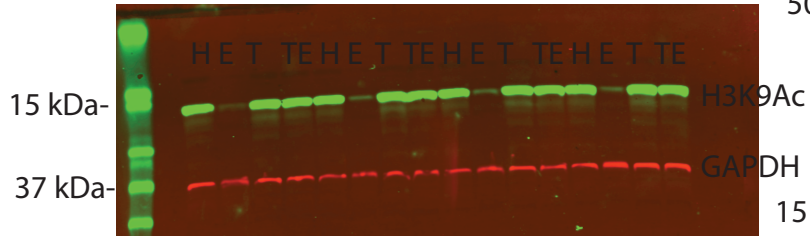

Fig 1e Full Length Blots (H3 & GAPDH)

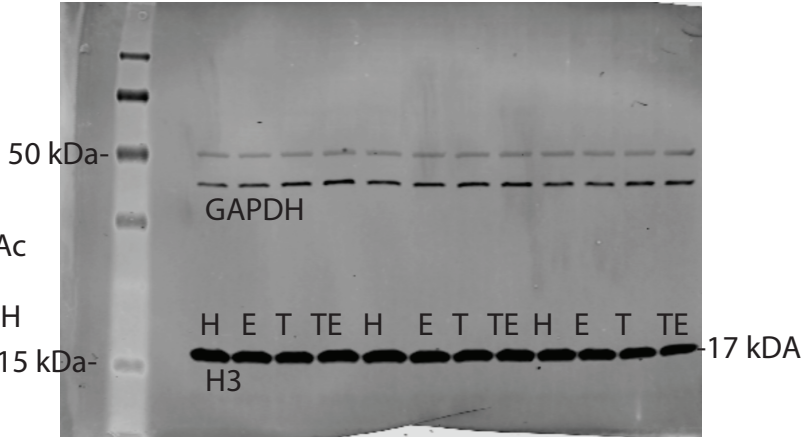

Fig 1e Full Length Blots (H3K14Ac)

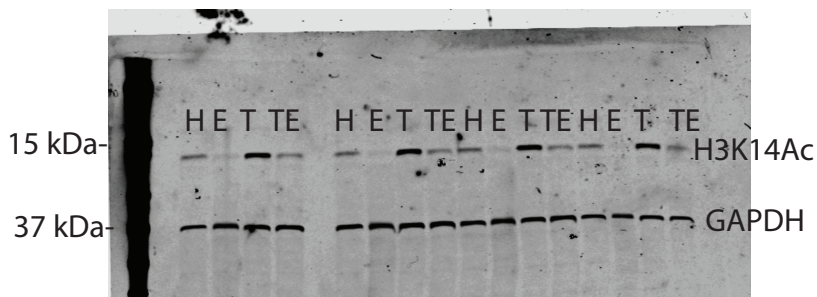

Fig 1e Full Length Blots (H3K4me2)

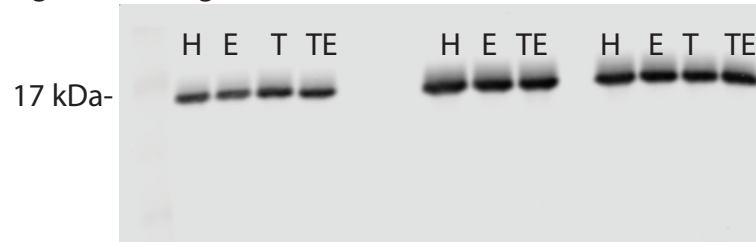

Fig 1e Full Length Blots (H3K4me3)

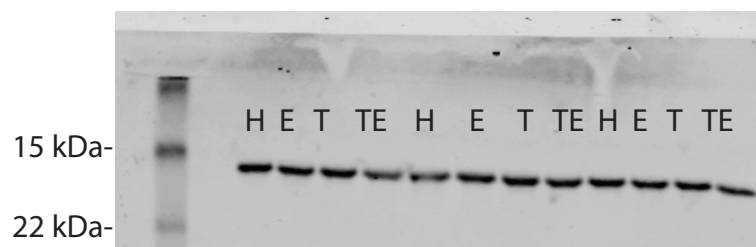

Supplement: 41386_2018_34_MOESM7_ESM.pdf [file 41386_2018_34_MOESM7_ESM.pdf]
