# Supplementary material
Source: PubMed Central journal article supplement (PMC5983537)

Supplementary Figure 1

**a** Acute Intoxication

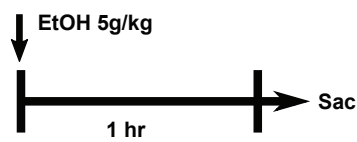

**e** Acute Withdrawal

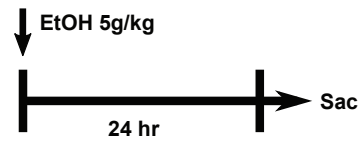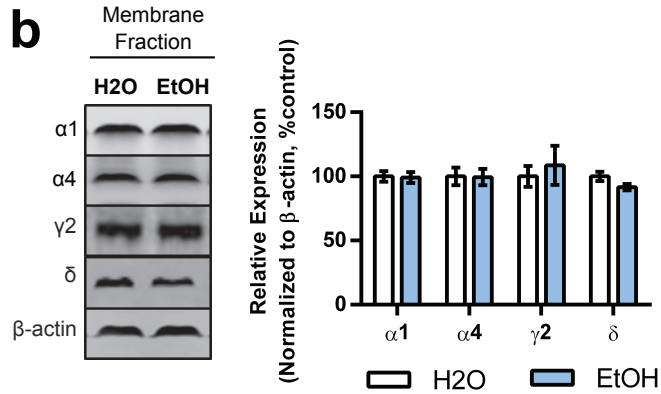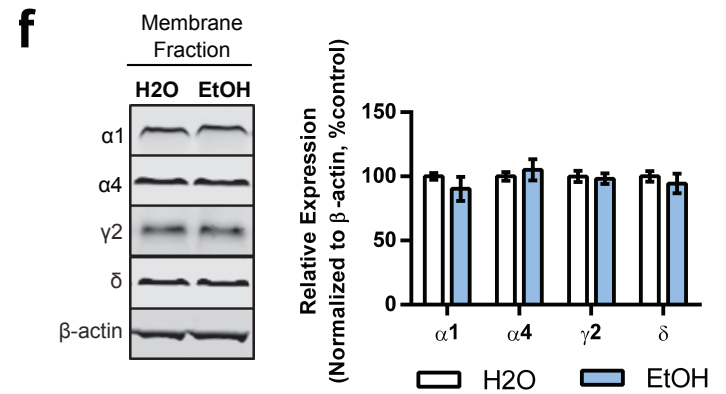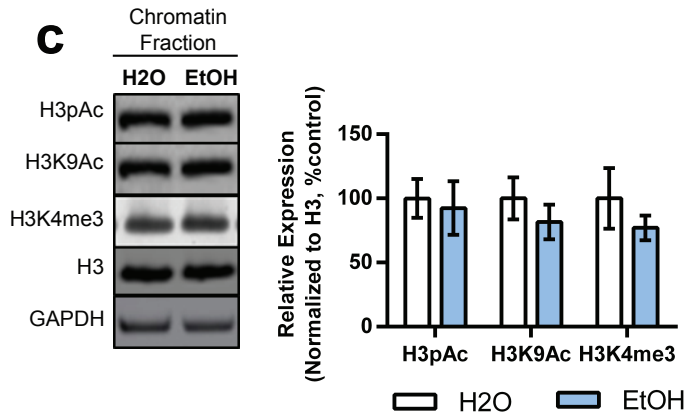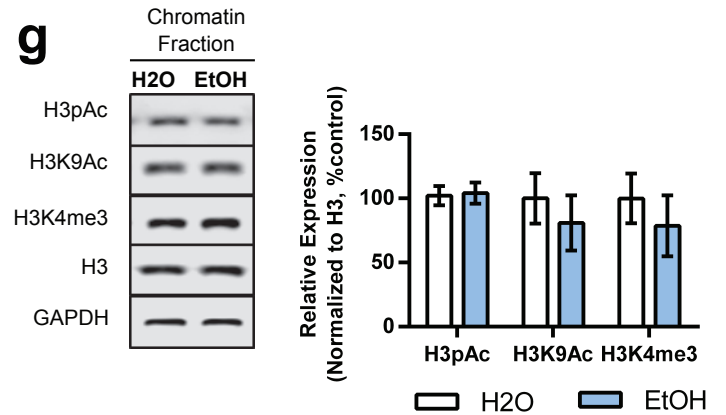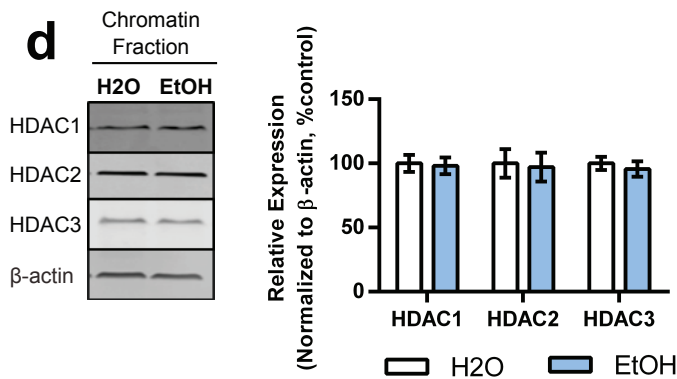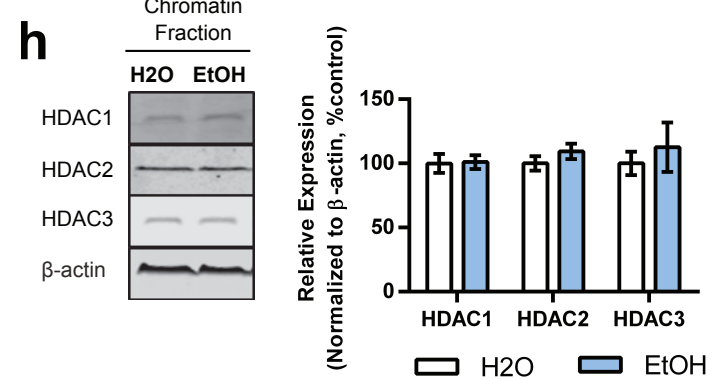

Supplement: 41386_2018_34_MOESM2_ESM.pdf [file 41386_2018_34_MOESM2_ESM.pdf]
